# Supplementary material for: The Chalcone Lonchocarpin Inhibits Wnt/β-Catenin Signaling and Suppresses Colorectal Cancer Proliferation
Source: PubMed Central journal article supplement (PMC6966512; doi:10.3390/cancers11121968), 2019-12-07

## The Chalcone Lonchocarpin Inhibits Wnt/ $\beta$ -Catenin Signaling and Suppresses Colorectal Cancer Proliferation

Danilo Predes, Luiz F. S. Oliveira, Laís S. S. Ferreira, Lorena A. Maia, João M. A. Delou, Anderson Faletti, Igor Oliveira, Nathalia G. Amado, Alice H. Reis, Carlos A. M. Fraga, Ricardo Kuster, Fabio A. Mendes, Helena L. Borges and Jose G. Abreu

Table S1. Ki67 positive cells means of each treatment group.

| Vehicle 50          | Vehicle 100         | Lonchocarpin<br>50 mg·kg <sup>-1</sup> ·day <sup>-1</sup> | Lonchocarpin<br>100 mg·kg <sup>-1</sup> ·day <sup>-1</sup> |
|---------------------|---------------------|-----------------------------------------------------------|------------------------------------------------------------|
| 48.38% <sup>1</sup> | 41.03% <sup>1</sup> | 40.86% <sup>1</sup>                                       | 30.20% <sup>1</sup>                                        |
| 33.57% <sup>1</sup> | 33.30% <sup>1</sup> | 15.05% <sup>1</sup>                                       | 29.16% <sup>1</sup>                                        |
| 44.50% <sup>1</sup> | 47.43% <sup>1</sup> | 43.22% <sup>1</sup>                                       | 31.82% <sup>1</sup>                                        |
|                     |                     |                                                           | 23.28% <sup>1</sup>                                        |
| Mean = 42.15%       | Mean = 40.59%       | Mean = 33.04%                                             | Mean = 28.62%                                              |

<sup>1</sup> The number represents the mean average percentage of Ki67 positive cells of each tested mouse.

Table S2. BrdU positive cell means of each treatment group.

| Vehicle 50          | Vehicle 100         | Lonchocarpin<br>50 mg·kg <sup>-1</sup> ·day <sup>-1</sup> | Lonchocarpin<br>100 mg·kg <sup>-1</sup> ·day <sup>-1</sup> |
|---------------------|---------------------|-----------------------------------------------------------|------------------------------------------------------------|
| 29.96% <sup>1</sup> | 24.56% <sup>1</sup> | 23.47% <sup>1</sup>                                       | 11.85% <sup>1</sup>                                        |
| 15.43% <sup>1</sup> | 22.01% <sup>1</sup> | 6.30% <sup>1</sup>                                        | 16.48% <sup>1</sup>                                        |
| 21.53% <sup>1</sup> | 19.73% <sup>1</sup> | 17.91% <sup>1</sup>                                       | 14.14% <sup>1</sup>                                        |
|                     |                     |                                                           | 11.98% <sup>1</sup>                                        |
| Mean = 22.31%       | Mean = 22.10%       | Mean = 15.89%                                             | Mean = 13.61%                                              |

<sup>1</sup> The number represents the mean average percentage of BrdU positive cells of each tested mouse.

**A Maternal injection**

|              | Normal | Reduced anterior structures | n  |
|--------------|--------|-----------------------------|----|
| Uninjected   | 100 %  | 0 %                         | 25 |
| DMSO         | 100 %  | 0 %                         | 15 |
| lonchocarpin | 77 %   | 23 %                        | 26 |

**B Zygotic injection**

|              | Normal | Enlarged anterior structures | n  |
|--------------|--------|------------------------------|----|
| Uninjected   | 100 %  | 0 %                          | 18 |
| DMSO         | 100 %  | 0 %                          | 10 |
| lonchocarpin | 52 %   | 48 %                         | 29 |

**C Double axis assay**

|                    | Normal | Double axis | n  |
|--------------------|--------|-------------|----|
| Uninjected         | 100 %  | 0 %         | 32 |
| xWnt8              | 12 %   | 88 %        | 25 |
| xWnt8+DMSO         | 15 %   | 85 %        | 47 |
| xWnt8+lonchocarpin | 32 %   | 68 %        | 34 |

**Figure S1.** *Xenopus laevis* embryo assays quantification. (A) Quantification of the maternal injection experiment (Figure 3A–D). (B) Quantification of the zygotic injection experiment (Figure 3E–H). (C) Quantification of the double axis assay (Figure 3I–M,P).

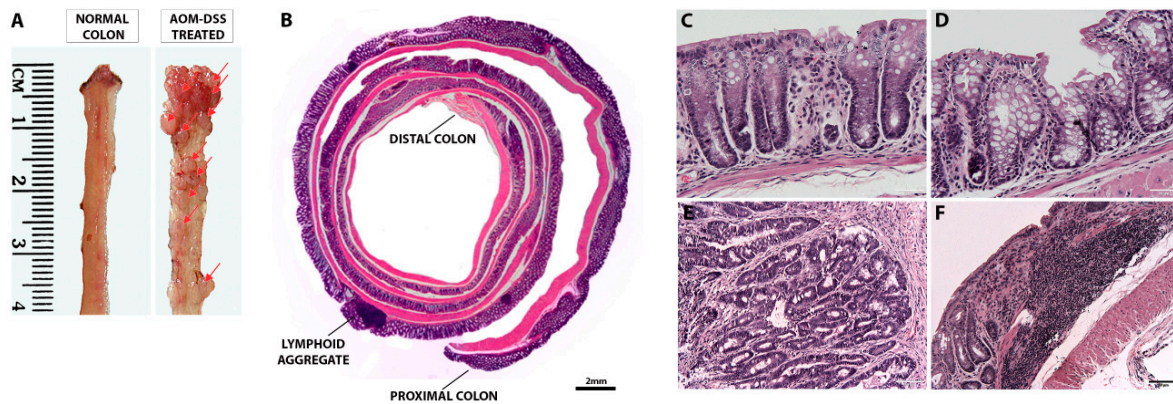

**Figure S2.** AOM-DSS tumor induction protocol. (A,B) Colon macroscopic features of the animals. (B) Overview of a swiss-rolled normal colon. The most distal portion of the colon is located in the innermost segment of the roller. Scale bar represents 2mm (C–F) Histopathology of the colon in different sections stained by H&E. (C) Normal colon epithelium; (D) Aberrant crypt foci; (E) Adenoma; (F) Leukocyte infiltrate. (C–F) Magnification: 20x. Scale bar represents 50  $\mu$ m.

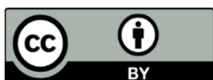

Supplement: cancers-11-01968-s001.pdf [file cancers-11-01968-s001.pdf]
